# Supplementary material
Source: PubMed Central journal article supplement (PMC4083497)

# Supplementary Figure 1 - Lajoie et al

**A**

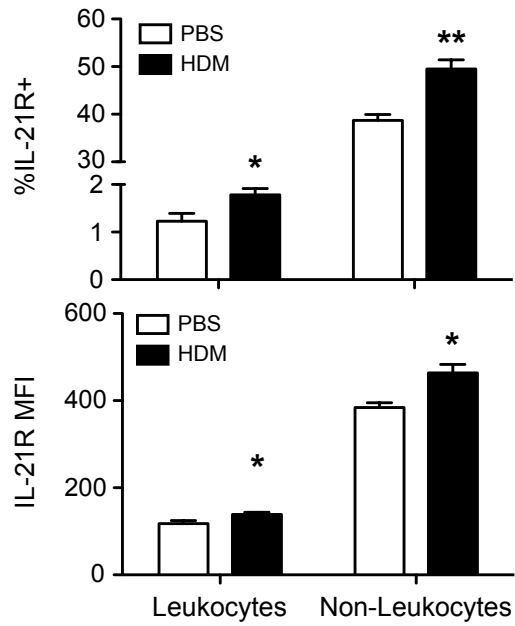

**B**

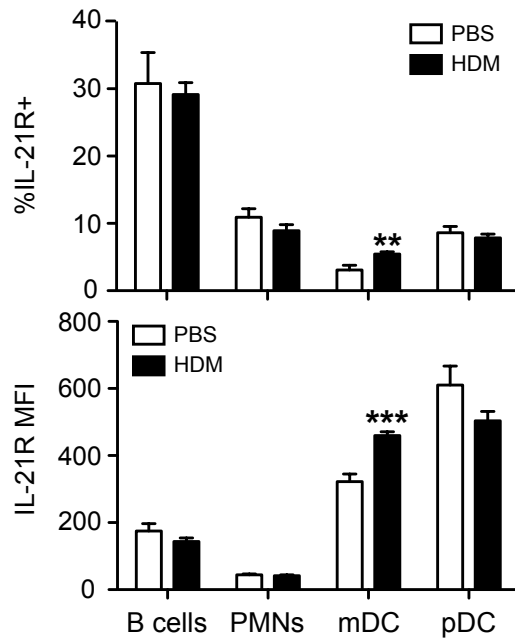

Supplement: NIHMS594317-supplement-Supp_Fig_S1.pdf [file NIHMS594317-supplement-Supp_Fig_S1.pdf]

# Supplementary Fig. 2 - Lajoie et al

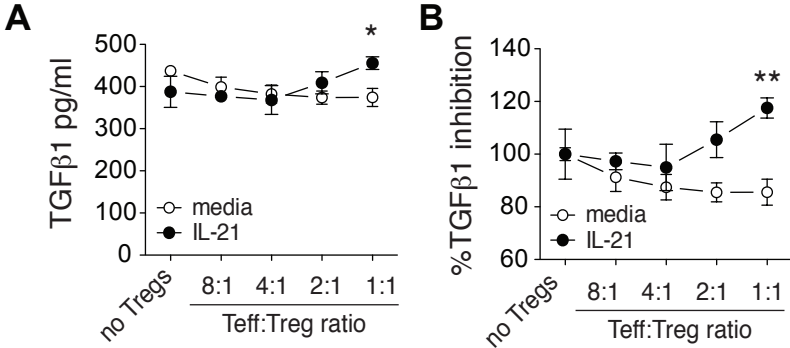

Supplement: NIHMS594317-supplement-Supp_Fig_S2.pdf [file NIHMS594317-supplement-Supp_Fig_S2.pdf]
